# Supplementary material for: Prediction of 3-hydroxypyridin-4-one (HPO) log K1 values for Fe(iii)
Source: Royal Society of Chemistry journal article supplement (doi:10.1039/c2dt31254a), 2012-01-01
Supplement: c2dt31254a.pdf [file c2dt31254a.pdf]

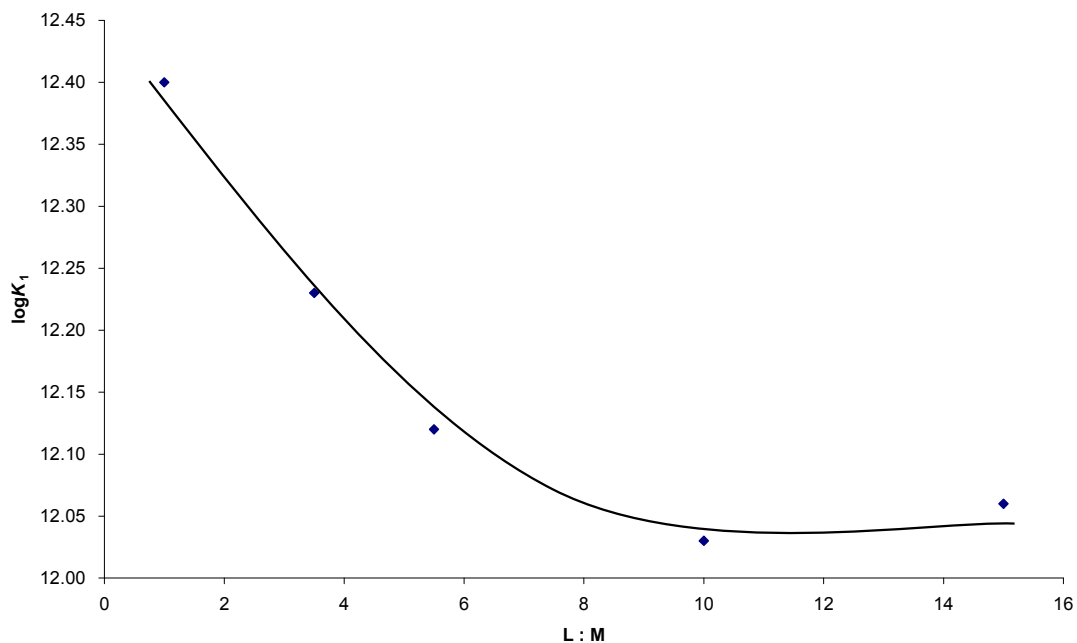

Fig. S 1  $\log K_1$  versus molar ratio of L : M for CP511

Table S 1 Experimentally determined (former data in the existing literature<sup>22, 24, 25</sup>)  $\log K_1$  values of 10 off-line HPOs<sup>a</sup> in Fig. 3.

|       | $\log K_1$                  |
|-------|-----------------------------|
| CP102 | 14.69 (15.70) <sup>25</sup> |
| CP110 | 14.78 (16.60) <sup>25</sup> |
| CP359 | 14.26 (14.66) <sup>22</sup> |
| CP364 | 14.28 (14.47) <sup>22</sup> |
| CP365 | 14.15 (15.21) <sup>22</sup> |
| CP366 | 13.82 (15.67) <sup>22</sup> |
| CP372 | 14.29 (14.93) <sup>22</sup> |
| CP511 | 12.03 (14.50) <sup>24</sup> |
| CP545 | 11.32 (11.67) <sup>24</sup> |
| CP510 | 12.20 (11.77) <sup>24</sup> |

<sup>a</sup> The structures are in Table 1.
